# Supplementary material for: Latent gammaherpesvirus exacerbates arthritis through modification of age-associated B cells
Source: eLife. 2021 Jun 3;10:e67024. doi: 10.7554/eLife.67024 (PMC8337075; doi:10.7554/eLife.67024)
Supplement: Figure 1—figure supplement 1—source data 1. [file elife-67024-fig1-figsupp1-data1.xlsx]

## Sheet: Sheet1
Figure 1 - figure supplement 1B	CIA																													MHV68 CIA
Area under the curve	3	8	11	41	36.5	39	29	28.5	23.5	25.5	28.5	35.5	33.5	24	29.5	23	33.5	31	39.5	31.5	45	15.5	5.5	9.5	13	21.5	10	13	12.5	12	7	61.5	47.5	50.5	57	37	45.5	51	47	44.5	48	39.5	44	47	46	50	47	25.5	17.5
Figure 1 - figure supplement 1C
Endpoint	0	0	0	4	5	4	2	3	3	3	3	3	3	2	3	2	3	4	5	3	2	3	1	1	2	3	2	2	3	0	2	5	5	5	6	4	3	4	4	3	4	3	4	4	4	4	4	3	1
Figure 1 - figure supplement 1D
Cumulative score	3	8	11	43	39	41	30	30	25	27	30	37	35	25	31	24	35	33	42	33	46	17	6	10	14	23	11	14	14	12	8	64	50	53	60	39	47	53	49	46	50	41	46	49	48	52	49	27	18
Figure 1 - figure supplement 1E
Clinical scores	CIA F												CIA M																	MHV68 CIA F											MHV68 CIA M
0	0	0	0	0	0	0	0	0	0	0	0	0	0	0	0	0	0	0	0	0	0	0	0	0	0	0	0	0	0	0	0	0	0	0	0	0	0	0	0	0	0	0	0	0	0	0	0	0	0
	0	0	0	0	0	0	0	0	0	0	0	0	0	0	0	0	0	0	0	0	0	0	0	0	0	0	0	0	0	0	0	0	0	0	0	0	0	0	0	0	0	0	0	0	0	0	0	0	0
	0	0	0	0	0	0	0	0	0	0	0	0	0	0	0	0	0	0	0	0	0	0	0	0	0	0	0	0	0	0	0	0	0	0	0	0	0	0	0	0	0	0	0	0	0	0	0	0	0
7	0	0	0	0	0	0	0	0	0	0	0	0	0	0	0	0	0	0	0	0	0	0	0	0	0	0	0	0	0	0	0	0	0	0	0	0	0	0	0	0	0	0	0	0	0	0	0	0	0
	0	0	0	0	0	0	0	0	0	0	0	0	0	0	0	0	0	0	0	0	0	0	0	0	0	0	0	0	0	0	0	0	0	0	0	0	0	0	0	0	0	0	0	0	0	0	0	0	0
	0	0	0	0	0	0	0	0	0	0	0	0	0	0	0	0	0	0	0	0	0	0	0	0	0	0	0	0	0	0	0	0	0	0	0	0	0	0	0	0	0	0	0	0	0	0	0	0	0
14	0	0	0	0	0	0	0	0	0	0	0	0	0	0	0	0	0	0	0	0	0	0	0	0	0	0	0	0	0	0	0	0	0	0	0	0	0	0	0	0	0	0	0	0	0	0	0	0	0
	0	0	0	0	0	0	0	0	0	0	0	0	0	0	0	1	1	1	0	0	0	0	0	0	0	0	0	0	0	0	0	1	0	0	0	0	0	1	1	1	0	0	1	0	0	1	0	0	0
	0	0	0	0	0	0	0	0	0	0	0	0	0	0	0	3	1	1	0	0	1	0	0	0	0	0	0	0	0	0	1	2	0	1	0	0	0	1	1	1	0	0	1	0	0	2	2	0	2
21	0	1	0	0	0	0	0	0	1	0	0	0	0	0	0	1	0	0	1	0	1	0	0	0	0	0	0	0	0	0	2	2	0	1	1	0	1	0	1	0	0	0	1	2	3	3	2	1	2
	1	1	0	1	0	0	0	0	3	0	0	0	0	0	0	1	1	0	1	0	1	0	0	1	0	0	0	0	0	0	2	2	1	1	1	2	0	0	1	1	1	1	3	1	3	3	1	1	2
	1	1	1	2	0	0	1	0	5	0	0	0	0	0	0	2	1	0	2	1	1	0	1	1	1	1	0	0	0	0	2	2	1	2	2	3	0	0	1	0	1	1	3	3	2	3	2	2	2
28	1	1	1	1	1	0	1	0	4	0	0	0	0	0	1	1	1	3	1	1	2	1	1	1	0	0	1	0	0	2	2	2	1	2	2	3	0	1	0	1	0	1	4	1	4	1	2	2	2
	1	1	0	1	2	2	0	2	2	1	0	0	0	0	1	2	1	3	1	2	1	2	1	1	0	1	0	0	0	2	1	2	2	2	2	3	0	0	0	0	0	1	4	2	3	3	2	2	2
	1	1	1	2	2	2	1	2	3	1	0	0	0	0	1	2	1	2	1	1	2	2	1	2	0	1	0	0	0	2	2	2	2	2	3	3	2	1	1	0	1	0	3	3	2	3	2	2	3
35	2	2	2	2	1	2	2	2	4	0	0	1	0	0	1	3	2	3	1	1	2	2	1	2	1	1	1	0	0	2	3	3	2	2	3	4	2	1	0	1	0	0	3	3	4	2	3	4	3
	2	3	2	2	2	2	1	3	2	0	0	1	0	0	1	3	4	4	2	3	2	3	2	3	0	0	1	1	0	3	4	3	2	3	3	4	2	1	1	1	1	1	4	4	3	4	4	3	4
	3	2	2	3	1	2	1	3	3	0	1	1	0	0	0	2	2	3	2	2	3	1	3	2	1	2	0	1	1	3	4	4	3	4	4	3	2	1	1	1	2	1	4	3	3	4	3	4	3
42	2	1	2	3	2	3	2	3	3	1	1	1	1	3	2	2	2	2	2	2	3	2	3	4	1	2	0	1	1	4	3	4	4	4	4	3	2	2	1	1	2	0	4	2	3	3	4	3	4
	2	2	2	3	2	3	3	3	3	1	0	0	1	2	1	3	2	3	2	3	3	2	5	3	2	2	1	1	1	4	3	4	4	3	4	3	2	2	2	1	1	0	3	4	3	4	4	3	4
	3	2	2	2	2	4	3	3	3	1	0	1	0	0	0	2	3	2	2	3	3	3	5	3	2	2	1	3	1	3	3	4	4	3	4	4	2	1	2	2	1	0	5	3	3	4	4	4	3
49	3	3	2	3	3	3	2	3	3	3	1	1	0	2	1	3	4	2	2	2	3	3	4	2	1	2	1	1	2	3	4	4	4	4	4	3	3	2	1	2	1	0	5	5	3	4	3	4	3
	3	3	2	3	3	3	2	4	3	3	1	1	1	1	1	4	4	4	2	3	3	4	5	2	1	2	1	1	2	3	4	4	4	4	4	3	3	2	1	2	1	0	5	5	5	4	4	4	3
	3	3	3	4	2	2	3	4	2	3	1	2	0	0	1	4	4	4	2	3	3	4	5	3	2	4	2	3	3	4	4	4	4	4	4	3	3	1	4	2	0	0	6	4	4	6	3	4	4
56	2	3	3	3	2	3	2	3	2	3	1	1	0	0	0	4	5	4	3	3	3	4	5	3	2	3	2	2	3	4	3	4	3	4	4	4	3	1	4	2	0	2	5	5	5	6	4	3	4
Figure 1 - figure supplement 1F
IgG	Naive			CIA				MHV68 CIA
1:100	0.0609289	0.0795902	0.0829965	0.506466	0.484728	0.644727	0.544657	0.700609	0.550428	0.553048	0.383756
1:200	0.0738491	0.0910728	0.0576993	0.438298	0.399384	0.564013	0.492101	0.524672	0.47107	0.458454	0.33849
1:400	0.0537909	0.0799002	0.0565475	0.352338	0.286523	0.448572	0.363856	0.486241	0.508932	0.35237	0.188157
1:800	0.0719081	0.0910175	0.0616416	0.218934	0.202874	0.357882	0.306118	0.367836	0.439188	0.257403	0.217694
1:1600	0.0565141	0.067431	0.0567303	0.155735	0.136789	0.241304	0.207281	0.260126	0.350149	0.178172	0.0936246
1:3200	0.0628424	0.0700731	0.0503274	0.107312	0.0975782	0.166431	0.152606	0.182737	0.268206	0.118053	0.0768616
1:6400	0.0635122	0.067808	0.0629808	0.0744484	0.095325	0.147332	0.105356	0.128498	0.162635	0.125531	0.155841
1:12800	0.0591097	0.0803408	0.055899	0.080338	0.111576	0.124198	0.0926101	0.115087	0.136655	0.0792338	0.0729911
Figure 1 - figure supplement 1G
IgG1 titres	Naïve			CIA				MHV68 CIA
1:100	0.0856632	0.0746917	0.0761511	0.419362	0.268801	0.218608	0.21179	0.269262	0.574145	0.116324	0.0900003
1:200	0.0982261	0.0682243	0.0619488	0.256072	0.183836	0.127679	0.121034	0.164528	0.375672	0.0937258	0.0827633
1:400	0.0653171	0.0680512	0.0747147	0.163886	0.122075	0.0988292	0.137902	0.105921	0.219188	0.0706642	0.205663
1:800	0.0793001	0.0619124	0.0684394	0.112334	0.102749	0.0858929	0.0743817	0.0929456	0.139728	0.0695218	0.0621719
1:1600	0.0737716	0.0750944	0.0636392	0.0904078	0.079203	0.0709711	0.0872783	0.066961	0.120711	0.0644983	0.0772364
1:3200	0.0664009	0.0600395	0.0624216	0.0746829	0.0731154	0.0681311	0.0737158	0.0652381	0.0844922	0.0612927	0.125305
1:6400	0.0741037	0.0709523	0.0629486	0.064397	0.0638892	0.0646382	0.068881	0.0659326	0.074613	0.0767013	0.065502
1:12800	0.083115	0.0638943	0.0597349	0.0616751	0.0646644	0.0642788	0.0677509	0.115411	0.0749665	0.0635031	0.0969029
Figure 1 - figure supplement 1H
IgG2c titres	Naïve			CIA				MHV68 CIA
1:100	0.0707745	0.0657463	0.0516069	0.432267	0.440973	0.571023	0.44222	0.455599	0.590359	0.416659	0.392693
1:200	0.0513235	0.0467712	0.0550787	0.45616	0.520616	0.566034	0.59063	0.531449	0.670751	0.417769	0.374782
1:400	0.0557453	0.0490654	0.052187	0.385028	0.417716	0.559922	0.495724	0.419837	0.659685	0.319527	0.281376
1:800	0.0570409	0.0484253	0.0551204	0.239386	0.282117	0.459922	0.388193	0.308981	0.5358	0.206224	0.169817
1:1600	0.0672281	0.0482051	0.0538651	0.1546	0.192203	0.400001	0.272967	0.240198	0.449532	0.139962	0.113196
1:3200	0.0839188	0.0599954	0.0556815	0.104841	0.127985	0.319401	0.201082	0.133037	0.411058	0.0982941	0.0831707
1:6400	0.0566069	0.0590393	0.0570674	0.0760876	0.0880579	0.214404	0.126881	0.0838259	0.292338	0.0702703	0.0675605
1:12800	0.0581361	0.0501352	0.0551344	0.141251	0.0761779	0.149145	0.0974782	0.0674019	0.215364	0.0621698	0.0636483
Figure 1 - figure supplement 1I	MHV68 CIA Ctrl								MHV68 CIA KO
MHV68 load	1097.78	820.378	1417.51	2247.51	260.374	614.798	1184.06	1039.58	4447.36	5523.22	2088.79	7355.58	1810.72	1914.37	3007.1
[truncated: 16 more columns]
