# Supplementary material for: Latent gammaherpesvirus exacerbates arthritis through modification of age-associated B cells
Source: eLife. 2021 Jun 3;10:e67024. doi: 10.7554/eLife.67024 (PMC8337075; doi:10.7554/eLife.67024)
Supplement: Figure 1—source data 1. [file elife-67024-fig1-data1.xlsx]

## Sheet: Sheet1
Figure 1A	CIA clinical score
Day post-indcution	CIA																				MHV68 CIA																				MHV68
0	0	0	0	0	0	0	0	0	0	0	0	0	0	0	0	0	0	0	0	0	0	0	0	0	0	0	0	0	0	0	0	0	0	0	0	0	0	0	0	0	0	0	0	0	0	0	0	0	0
	0	0	0	0	0	0	0	0	0	0	0	0	0	0	0	0	0	0	0	0	0	0	0	0	0	0	0	0	0	0	0	0	0	0	0	0	0	0	0	0	0	0	0	0	0	0	0	0	0
	0	0	0	0	0	0	0	0	0	0	0	0	0	0	0	0	0	0	0	0	0	0	0	0	0	0	0	0	0	0	0	0	0	0	0	0	0	0	0	0	0	0	0	0	0	0	0	0	0
7	0	0	0	0	0	0	0	0	0	0	0	0	0	0	0	0	0	0	0	0	0	0	0	0	0	0	0	0	0	0	0	0	0	0	0	0	0	0	0	0	0	0	0	0	0	0	0	0	0
	0	0	0	0	0	0	0	0	0	0	0	0	0	0	0	0	0	0	0	0	0	0	0	0	0	0	0	0	0	0	0	0	0	0	0	0	0	0	0	0	0	0	0	0	0	0	0	0	0
	0	0	0	0	0	0	0	0	0	0	0	0	0	0	0	0	0	0	0	0	0	0	0	0	0	0	0	0	0	0	0	0	0	0	0	0	0	0	0	0	0	0	0	0	0	0	0	0	0
14	0	0	0	0	0	0	0	0	0	0	0	0	0	0	0	0	0	0	0	0	0	0	0	0	0	0	0	0	0	0	0	0	0	0	0	0	0	0	0	0	0	0	0	0	0	0	0	0	0
	0	0	0	1	1	1	0	0	0	0	0	0	0	0	0	0	0	0	0	0	0	0	1	0	0	1	0	0	1	0	0	0	0	0	0	0	0	0	0	1	0	0	0	0	0	0	0	0	0
	0	0	0	3	1	1	0	0	0	0	0	1	0	0	0	0	0	0	0	0	0	0	1	0	0	2	0	1	2	2	0	2	0	1	0	0	0	1	0	1	0	0	0	0	0	0	0	0	0
21	0	0	0	1	0	0	0	1	0	1	0	1	0	0	0	0	0	0	0	0	0	0	1	2	3	3	0	2	2	2	1	2	0	1	1	0	0	1	1	0	0	0	0	0	0	0	0	0	0
	0	0	0	1	1	0	1	1	0	1	0	1	1	0	0	0	0	0	0	1	1	1	3	1	3	3	0	2	2	1	1	2	1	1	1	2	1	2	0	0	0	0	0	0	0	0	0	0	0
	0	0	0	2	1	0	1	1	1	2	1	1	2	0	0	1	0	0	1	1	1	1	3	3	2	3	0	2	2	2	2	2	1	2	2	3	3	1	0	0	0	0	0	0	0	0	0	0	0
28	0	0	1	1	1	3	1	1	1	1	1	2	1	1	0	1	0	1	1	1	0	1	4	1	4	1	2	2	2	2	2	2	1	2	2	3	3	2	0	1	0	0	0	0	0	0	0	0	0
	0	0	1	2	1	3	1	1	0	1	2	1	1	2	2	0	2	2	1	1	0	1	4	2	3	3	2	1	2	2	2	2	2	2	2	3	3	3	0	0	0	0	0	0	0	0	0	0	0
	0	0	1	2	1	2	1	1	1	1	1	2	2	2	2	1	2	2	1	2	1	0	3	3	2	3	2	2	2	2	2	3	2	2	3	3	3	4	2	1	0	0	0	0	0	0	0	0	0
35	0	0	1	3	2	3	2	2	2	1	1	2	2	1	2	2	2	2	1	2	0	0	3	3	4	2	2	3	3	3	4	3	2	2	3	4	3	4	2	1	0	0	0	0	0	0	0	0	0
	0	0	1	3	4	4	2	3	2	2	3	2	2	2	2	1	3	3	2	3	1	1	4	4	3	4	3	4	3	4	3	4	2	3	3	4	4	4	2	1	0	0	0	0	0	0	0	0	0
	0	0	0	2	2	3	3	2	2	2	2	3	3	1	2	1	3	1	3	2	2	1	4	3	3	4	3	4	4	3	4	3	3	4	4	3	4	3	2	1	0	0	0	0	0	0	0	0	0
42	1	3	2	2	2	2	2	1	2	2	2	3	3	2	3	2	3	2	3	4	2	0	4	2	3	3	4	3	4	4	3	4	4	4	4	3	4	3	2	2	0	0	0	0	0	0	0	0	0
	1	2	1	3	2	3	2	2	2	2	3	3	3	2	3	3	3	2	5	3	1	0	3	4	3	4	4	3	4	4	3	4	4	3	4	3	4	4	2	2	0	0	0	0	0	0	0	0	0
	0	0	0	2	3	2	3	2	2	2	3	3	2	2	4	3	3	3	5	3	1	0	5	3	3	4	3	3	4	4	4	3	4	3	4	4	4	3	2	1	0	0	0	0	0	0	0	0	0
49	0	2	1	3	4	2	3	3	2	2	2	3	3	3	3	2	3	3	4	2	1	0	5	5	3	4	3	4	4	3	4	3	4	4	4	3	4	3	3	2	0	0	0	0	0	0	0	0	0
	1	1	1	4	4	4	3	3	2	2	3	3	3	3	3	2	4	4	5	2	1	0	5	5	5	4	3	4	4	4	4	3	4	4	4	3	4	4	3	2	0	0	0	0	0	0	0	0	0
	0	0	1	4	4	4	3	3	3	2	3	3	4	2	2	3	4	4	5	3	0	0	6	4	4	6	4	4	4	3	4	4	4	4	4	3	4	3	3	1	0	0	0	0	0	0	0	0	0
56	0	0	0	4	5	4	2	3	3	3	3	3	3	2	3	2	3	4	5	3	0	2	5	5	5	6	4	3	4	4	3	4	3	4	4	4	4	4	3	1	0	0	0	0	0	0	0	0	0
Figure 1B	Change in paw height
Day post-indcution	CIA																				MHV68 CIA																		MHV68
7	-0.1	0	-0.3	0	0.05	0.05	-0.1	-0.15	0.1	0.05	0.1	0.05	-0.1	0.05	0	-0.2	-0.2	0.15	-0.25	0.05	-0.05	0.05	-0.1	-0.05	-0.15	-0.05	0.2	-0.15	0.05	0.2	-0.3	0.05	-0.2	-0.15	0.15	0	0.25	-0.05	-0.15	-0.3	0.2	0.25	-0.1	-0.1	0.1	-0.1	0	0
14	0.15	0.1	0.15	0.1	0	0	-0.1	-0.15	-0.15	0.05	0.2	-0.05	0	0.15	0	0	-0.2	0.15	-0.1	0	0.15	0.05	0.4	0.4	0.2	0.1	0.35	-0.2	0.1	0	-0.3	0.15	-0.15	-0.2	0	0.05	0.25	-0.05	0	-0.2	0.2	0.1	-0.2	-0.05	0.3	-0.2	0.1	-0.2
21	0.3	0.35	0.05	0.35	0.05	-0.05	0	-0.15	0.6	0.25	0.15	0	0.05	0.1	0	-0.1	-0.2	0.05	0.05	-0.1	0.4	0.4	0.4	0.45	0.3	0.3	0.05	-0.25	-0.05	0.25	-0.1	0.3	-0.1	0	0.15	0.05	0.25	-0.2	-0.1	-0.2	0.4	0.15	-0.2	-0.1	0	0	-0.1	-0.05
28	0.35	0.4	0.2	0.45	0.35	0.25	0.1	0.2	0.15	-0.05	0.25	0.5	0.05	-0.15	0.1	-0.1	0	0.15	-0.05	-0.05	0.85	0.75	0.45	0.65	0.55	0.6	0.3	-0.25	-0.05	0.1	-0.05	0.35	-0.25	0.2	0.2	0.1	0.2	-0.05	0	-0.05	0.5	0.2	-0.3	-0.3	0.05	0.1	-0.1	-0.4
35	0.55	0.4	0.6	0.55	0.4	0.3	0.3	0.15	0.4	0.4	0.3	0.4	-0.25	-0.15	-0.05	-0.2	-0.05	0.15	-0.15	0.15	0.7	0.6	0.75	0.75	0.65	0.45	-0.05	-0.05	0.15	0.25	0.1	0.3	-0.35	-0.05	0.45	-0.2	0.45	0	0.1	-0.1	0.5	0.3	-0.2	-0.3	0.1	-0.1	-0.1	-0.05
42	0.55	0.35	0.55	0.65	0.55	0.15	0.9	-0.2	0.1	0.15	0.35	0.1	-0.2	0.05	-0.15	-0.1	-0.1	0.05	-0.05	0.15	0.75	0.65	0.55	0.7	0.65	0.55	-0.3	0.1	-0.1	0.2	0.05	0.55	0.2	0	0.6	0.3	0.25	0.3	0.1	-0.05	0.35	0.3	-0.2	-0.2	0.1	-0.05	-0.2	-0.15
49	0.45	0.4	0.4	0.45	0.55	0.15	0.45	0.25	0.05	0.3	0.2	0.3	0.35	0.1	-0.1	-0.2	0.05	0.05	0	0.15	0.6	0.75	0.5	0.55	0.7	0.55	0.15	-0.15	0.1	0.35	0.2	0.45	0.05	0.25	0.4	0.1	0.35	0.25	0.1	-0.1	0.3	0.4	-0.1	-0.15	0.2	-0.15	-0.1	-0.3
Figure 1C	Day of onset
Day of onset	CIA																													MHV68 CIA
	42	40	26	15	15	15	21	19	24	19	24	17	21	26	28	24	28	26	24	21	20	29	38	34	24	29	35	36	38	21	21	15	19	19	15	26	17	15	17	19	17	21	17	19	21	21	17	20	15
[truncated: 6 more columns]
