# Supplementary material for: Latent gammaherpesvirus exacerbates arthritis through modification of age-associated B cells
Source: eLife. 2021 Jun 3;10:e67024. doi: 10.7554/eLife.67024 (PMC8337075; doi:10.7554/eLife.67024)
Supplement: Figure 2—source data 1. [file elife-67024-fig2-data1.xlsx]

## Sheet: Sheet1
Figure 2A	CIA									MHV68 CIA
SF#CD8+	354	485	590	244	1084	756	142	437	787	4729	1935	3075	1204	943	2258	573	1030
SF #CD4+	734	3362	624	258	515	726	109	282	2070	3466	1412	1623	964	592	1049	311	492
Figure 2B
SF %Tbet+ of CD8+	4.8	2.27	2.88	5.33	2.77	4.5	7.04	2.97	1.65	11	20.5	7.84	15.7	2.86	16.5	7.68	15.9
SF %Tbet+ of CD4+	0.68	0.18	0.16	0.39	1.36	1.52	1.83	0.35	0.048	11.1	9.92	4.62	10.2	1.35	6.2	5.79	5.89
Figure 2C	CIA			MHV68 CIA
Relative expression of IFNg	1.45789	0.831908	1	398.702	152.999	4.8498	11.1805
Relative expression of IL17	2.78848	0.0881924	4.40786	0.013434	0.87987	1
