# Supplementary material for: Latent gammaherpesvirus exacerbates arthritis through modification of age-associated B cells
Source: eLife. 2021 Jun 3;10:e67024. doi: 10.7554/eLife.67024 (PMC8337075; doi:10.7554/eLife.67024)
Supplement: Figure 3—figure supplement 1—source data 1. [file elife-67024-fig3-figsupp1-data1.xlsx]

## Sheet: Sheet1
Figure 3 - figure supplement 1A	Naïve				MHV68					CIA																	MHV68 CIA
ILN # total cells	1600000	3575000	2800000	3250000	3960000	6120000	6120000	3780000	3960000	20475000	19575000	28125000	20250000	13275000	6637500	13500000	10800000	17325000	13725000	18450000	16875000	9337500	9112500	16425000	10912500	21825000	13725000	13500000	18225000	12037500	10125000	13050000	4387500	11587500	6412500	14737500	11137500	10462500	10800000	23512500
Figure 3 - figure supplement 1B
Spleen #CD4+FoxP3+	527670	620840	258720	482625	382470	617100	586520	506220	506605	297660	357335	351505	484770	247940	517880	512050	309155
Figure 3 - figure supplement 1C
Spleen #CD8+	5502200	5569300	2956800	4039750	3730650	6264500	6243600	6006000	3489200	6860700	8811000	6984450	9322500	4174500	9004050	9540300	6691300
Figure 3 - figure supplement 1D
Spleen #CD4+	11094600	10134300	5151300	6935500	6771600	10565500	10264100	11540100	6877750	9655800	10083700	11366850	12119250	6932200	12476200	14499100	10291050
Figure 3 - figure supplement 1E
ILN #CD4+FoxP3+	493448	426735	689063	573075	374355	255544	382050	344520	504158	323910	282150	464738	222694	250088	388890	161460	305910
Figure 3 - figure supplement 1F
ILN #CD8+	2702700	2681775	5653125	3989250	1712475	1420425	1890000	1814400	3516975	2127375	2160000	3280500	1492650	1336500	2479500	816075	1807650
Figure 3 - figure supplement 1G
ILN #CD4+	3767400	2740500	6187500	4374000	2216925	1712475	2227500	2278800	5162850	2813625	2484000	3863700	1757475	1863000	2766600	640575	2132100
Figure 3 - figure supplement 1H
Spleen %CD11c+CD8+	1.25	0.85	0.94	0.26	0.52	0.18	0.12	0.069	0.29	0.38	0.51	0.61	0.49	0.5	0.42	0.61	0.65	2.26	6.47	3.69	2.16	0.71	0.87	1.4	1.39	0.55	0.37	0.48	1.38	1.36	1.58	0.6	0.88
Figure 3 - figure supplement 1I
ILN %CD11c+CD8+	0.15	0.26	0.18	0.19	0.23	0.13	0.29	0.19	0.078	0.12	0.079	0.22	0.093	0.25	0.048	0.27	0.47	0.52	0.19	0.41	2.54	2.92	1.26	0.67	0.36	2.51
Figure 3 - figure supplement 1J
Spleen %CD11c+CD11b+	15.2	11.2	8.73	6.49	9.38	8.91	12.5	12.9	10.7	11.7	11.4	12.4	11.6	11.7	11.3	11.8	8.4	9.4	6.61	8.89	8.33	12.4	11.2	12.4
