# Supplementary material for: Latent gammaherpesvirus exacerbates arthritis through modification of age-associated B cells
Source: eLife. 2021 Jun 3;10:e67024. doi: 10.7554/eLife.67024 (PMC8337075; doi:10.7554/eLife.67024)
Supplement: Figure 3—source data 1. [file elife-67024-fig3-data1.xlsx]

## Sheet: Sheet1
Figure 3A	CIA															MHV68 CIA
Spleen %FoxP3+ of CD4+	5.06	4.49	4.62	3.33	7.56	4.8	4.76	6.15	5.03	6.95	5.64	5.82	5.69	4.41	7.36	4.65	3.42	4.58	5.44	5.28	3.08	3.54	3.09	3.98	3.57	4.15	3.52	3.01
ILN FoxP3+ of CD4+	4.62	4.22	4.4	5.2	2.84	4.62	3.15	4.55	6.51	5.8	5.2	6.2	6.48	2.86	2.85	2.43	4.88	5.25	4.16	2.55	3.22	3.29	4.39	4.91	6.65	3.82	4.83	5.73	3.15
Figure 3B
Spleen %CD8+	5.34	9.78	9.13	6.32	8.64	9.92	8.26	3.48	12.2	12.2	12.8	11.3	11.9	13.4	13.2	14	10.4	19.4	14	15.9	12.1	15.2	5.62	18.9	18	15.3	15	16.5	15.3	17.7	15.8
Spleen %CD4+	14.6	19.1	17.7	15.9	19.7	18.9	17.8	8.45	24.6	22.2	22.3	19.4	21.6	22.6	21.7	26.9	20.5	24	16.6	18.7	16.6	19.3	9.13	26.6	20.6	24.9	19.5	27.4	21.2	26.9	24.3
ILN %CD8+	28.5	18.4	16.6	23.7	19.4	13.7	17.7	21.9	13.2	13.7	20.1	19.7	12.9	21.4	14	16.8	20.3	18.3	14.1	16.8	14.3	9.55	15.8	15.5	16	18	12.4	13.2	19	18.6	15.6
ILN %CD4+	28.3	20.8	18.1	23	22.1	16.7	17.6	22	18.4	14	22	21.6	16.7	25.8	16.5	21.1	29.8	19.6	14.2	19	16.6	13.5	20.3	20.5	18.4	21.2	14.6	18.4	21.2	14.6	18.4
Figure 3C
Spleen %IFNg+ of CD8+	15.4	3.84	4.71	5.26	6.26	7.88	4.47	7.5	10.4	9.65	5.51	5.84	4.28	6.7	6.65	5.02	4.96	6.44	12.8	17.7	23.2	7.53	10.1	8.31	8.67	13.5	17.6	11.4	15	19.6	11.5	10.5	4.52	5.2	5.91	10.2	3.46	6.74
ILN %IFNg+ of CD8+	0.55	2.61	4.85	3.62	1.4	0.78	0.81	1.09	1.46	1.8	1.08	1.67	1.13	2.55	3.47	1.61	2.15	2.63	2.89	2.61	4.05	2.53	7.94	6.52	4.21	2.07	4.84	2.3	1.14	1.87	1.38	1.52	1.13	1.34	2.49	4.93	3.21	3.05	2	3.16	1.57	3.3
Figure 3D
Spleen %IFNg+ of CD4+	7.09	1.54	1.36	2.08	2.44	1.72	1.21	2.05	1.36	4.5	1.64	1.94	1.18	1.52	1.71	1.27	1.52	1.65	3.85	8.31	9.29	1.71	3.91	2.5	4.06	5.26	5.2	2.5	5.1	7.77	2.57	2.88	1.49	2.12	2.52	3	1.34	2.67
Spleen %IL17+ of CD4+	0.33	0.16	0.26	0.19	0.35	0.13	0.26	0.17	0.2	0.3	0.21	0.22	0.22	0.69	1.14	0.33	0.46	0.51	0.68	0.62	0.72	0.61	0.65	0.66	0.63	0.71	0.63	0.32	0.33	0.63	0.24	0.38	0.08	0.38	0.2	0.3	0.21	0.36	0.7	0.84	0.28	0.53	0.82	0.92	0.86	0.42	0.44	0.39	0.49
ILN %IFNg+ of CD4+	0.25	0.66	0.89	0.66	0.28	0.056	0.16	0.25	0.2	0.11	0.092	0.13	0.12	1.21	1.92	0.89	1.13	1.19	1.5	1.68	1.79	0.87	1.25	1	0.61	0.67	0.55	0.55		0.23	0.2	0.24	0.18	0.29	0.08	1.26	2.51	1.8	0.98	0.81	0.91	0.94	1.25
ILN %IL17+ of CD4+	0.3	0.52	0.99	0.5	0.5	0.94	0.49	0.43	0.28	0.21	0.26	0.25	0.29	0.24	0.44	0.41	0.15	0.66	1.42	0.47	0.95	0.68	0.68	0.42	0.41	0.7	1.05	0.19	0.36	0.21	0.41	0.72
Figure 3E
Relative expression ILN IFNg	0.684188	1	0.359978	6.88116	0.0859831	3.5443	1.63842	0.14221	5.18097	1.23109	1.97009	2.72941	1.87995	1.14699
Relative expression ILN IL17	1.06161	0.385986	1	1.6198	1.58325	0.597143	2.45854	1.92371	2.23782	1.11157
[truncated: 1 more columns]
