# Supplementary material for: Latent gammaherpesvirus exacerbates arthritis through modification of age-associated B cells
Source: eLife. 2021 Jun 3;10:e67024. doi: 10.7554/eLife.67024 (PMC8337075; doi:10.7554/eLife.67024)
Supplement: Figure 4—source data 1. [file elife-67024-fig4-data1.xlsx]

## Sheet: Sheet1
Figure 4A	Clinical scores
Day-post induction	CIA																				MHV68 CIA																				ACRTA MHV68 CIA
0	0	0	0	0	0	0	0	0	0	0	0	0	0	0	0	0	0	0	0	0	0	0	0	0	0	0	0	0	0	0	0	0	0	0	0	0	0	0	0	0	0	0	0	0	0	0	0	0	0
	0	0	0	0	0	0	0	0	0	0	0	0	0	0	0	0	0	0	0	0	0	0	0	0	0	0	0	0	0	0	0	0	0	0	0	0	0	0	0	0	0	0	0	0	0	0	0	0	0
	0	0	0	0	0	0	0	0	0	0	0	0	0	0	0	0	0	0	0	0	0	0	0	0	0	0	0	0	0	0	0	0	0	0	0	0	0	0	0	0	0	0	0	0	0	0	0	0	0
7	0	0	0	0	0	0	0	0	0	0	0	0	0	0	0	0	0	0	0	0	0	0	0	0	0	0	0	0	0	0	0	0	0	0	0	0	0	0	0	0	0	0	0	0	0	0	0	0	0
	0	0	0	0	0	0	0	0	0	0	0	0	0	0	0	0	0	0	0	0	0	0	0	0	0	0	0	0	0	0	0	0	0	0	0	0	0	0	0	0	0	0	0	0	0	0	0	0	0
	0	0	0	0	0	0	0	0	0	0	0	0	0	0	0	0	0	0	0	0	0	0	0	0	0	0	0	0	0	0	0	0	0	0	0	0	0	0	0	0	0	0	0	0	0	0	0	0	0
14	0	0	0	0	0	0	0	0	0	0	0	0	0	0	0	0	0	0	0	0	0	0	0	0	0	0	0	0	0	0	0	0	0	0	0	0	0	0	0	0	0	0	0	0	0	0	0	0	0
	0	0	0	1	1	1	0	0	0	0	0	0	0	0	0	0	0	0	0	0	0	0	1	0	0	1	0	0	1	0	0	0	0	0	0	0	0	0	0	1	0	0	0	0	0	0	0	0	0
	0	0	0	3	1	1	0	0	0	0	0	1	0	0	0	0	0	0	0	0	0	0	1	0	0	2	0	1	2	2	0	2	0	1	0	0	0	1	0	1	0	0	0	0	0	0	0	0	0
21	0	0	0	1	0	0	0	1	0	1	0	1	0	0	0	0	0	0	0	0	0	0	1	2	3	3	0	2	2	2	1	2	0	1	1	0	0	1	1	0	0	0	1	1	0	1	0	0	1
	0	0	0	1	1	0	1	1	0	1	0	1	1	0	0	0	0	0	0	1	1	1	3	1	3	3	0	2	2	1	1	2	1	1	1	2	1	2	0	0	0	0	0	1	0	1	0	1	0
	0	0	0	2	1	0	1	1	1	2	1	1	2	0	0	1	0	0	1	1	1	1	3	3	2	3	0	2	2	2	2	2	1	2	2	3	3	1	0	0	0	1	1	1	0	0	0	1	0
28	0	0	1	1	1	3	1	1	1	1	1	2	1	1	0	1	0	1	1	1	0	1	4	1	4	1	2	2	2	2	2	2	1	2	2	3	3	2	0	1	0	1	0	1	0	0	0	0	1
	0	0	1	2	1	3	1	1	0	1	2	1	1	2	2	0	2	2	1	1	0	1	4	2	3	3	2	1	2	2	2	2	2	2	2	3	3	3	0	0	0	1	1	0	0	0	0	0	1
	0	0	1	2	1	2	1	1	1	1	1	2	2	2	2	1	2	2	1	2	1	0	3	3	2	3	2	2	2	2	2	3	2	2	3	3	3	4	2	1	0	1	1	1	0	1	0	1	3
35	0	0	1	3	2	3	2	2	2	1	1	2	2	1	2	2	2	2	1	2	0	0	3	3	4	2	2	3	3	3	4	3	2	2	3	4	3	4	2	1	1	1	2	2	0	1	0	1	5
	0	0	1	3	4	4	2	3	2	2	3	2	2	2	2	1	3	3	2	3	1	1	4	4	3	4	3	4	3	4	3	4	2	3	3	4	4	4	2	1	2	2	2	1	0	1	0	1	5
	0	0	0	2	2	3	3	2	2	2	2	3	3	1	2	1	3	1	3	2	2	1	4	3	3	4	3	4	4	3	4	3	3	4	4	3	4	3	2	1	2	2	2	2	1	1	1	1	5
42	1	3	2	2	2	2	2	1	2	2	2	3	3	2	3	2	3	2	3	4	2	0	4	2	3	3	4	3	4	4	3	4	4	4	4	3	4	3	2	2	1	2	2	2	0	1	1	1	6
	1	2	1	3	2	3	2	2	2	2	3	3	3	2	3	3	3	2	5	3	1	0	3	4	3	4	4	3	4	4	3	4	4	3	4	3	4	4	2	2	2	2	2	3	0	1	1	1	6
	0	0	0	2	3	2	3	2	2	2	3	3	2	2	4	3	3	3	5	3	1	0	5	3	3	4	3	3	4	4	4	3	4	3	4	4	4	3	2	1	2	2	3	2	0	1	1	2	6
49	0	2	1	3	4	2	3	3	2	2	2	3	3	3	3	2	3	3	4	2	1	0	5	5	3	4	3	4	4	3	4	3	4	4	4	3	4	3	3	2	2	2	3	2	1	2	1	1	6
	1	1	1	4	4	4	3	3	2	2	3	3	3	3	3	2	4	4	5	2	1	0	5	5	5	4	3	4	4	4	4	3	4	4	4	3	4	4	3	2	2	3	3	3	1	2	1	1	6
	0	0	1	4	4	4	3	3	3	2	3	3	4	2	2	3	4	4	5	3	0	0	6	4	4	6	4	4	4	3	4	4	4	4	4	3	4	3	3	1	3	3	3	3	0	2	1	2	6
56	0	0	0	4	5	4	2	3	3	3	3	3	3	2	3	2	3	4	5	3	0	2	5	5	5	6	4	3	4	4	3	4	3	4	4	4	4	4	3	1	2	3	3	3	0	1	1	2	6
Figure 4B
CIA onset	21	19	24	19	24	17	20	29	38	34	24	29	35	36	38	26	17	15	20	15	15	15	17	15	34	22	17	19	17	33	24	30	19	49	19	38	21	28
Figure 4C
Spleen %CD8+	5.34	9.78	9.13	6.32	8.64	9.92	8.26	3.48	12.2	12.2	12.8	11.3	11.9	13.4	13.2	14	10.4	19.4	14	15.9	12.1	15.2	5.62	18.9	18	15.3	15	16.5	15.3	17.7	15.8	8.72	6.62	6.96	7.57	15.7	17.7	17.4	14.2	12.8
Figure 4D
Spleen %CD4+	31.6	42.4	28.4	33.2	22.1	45.2	24.6	22.2	22.3	19.4	21.6	22.6	21.7	26.9	20.5	18.6	26	29.9	34.6	30.6	34.1	26.6	20.6	24.9	19.5	27.4	21.2	26.9	24.3	21	27.8	18	32.6	30.6	23.4	23.2	25.5	21.6	19.8
Figure 4E
Spleen %IFNg+ of CD8+	15.4	3.84	4.71	5.26	6.26	7.88	4.47	7.5	10.4	9.65	5.51	3.66	2.99	3.46	3.08	17.7	23.2	7.53	10.1	8.31	8.67	13.5	17.6	11.4	15	19.6	11.5	10.5	4.46	9.56	10.7	8.21	7.92	3.08	3.43	2.78	2.98	4.26
Figure 4F
Spleen %IFNg+ of CD4+	7.09	1.54	1.36	2.08	2.44	1.72	1.21	2.05	1.36	4.5	1.64	2.24	1.6	2.48	1.63	8.31	9.29	1.71	3.91	2.5	4.06	5.26	5.2	2.5	5.1	7.77	2.57	2.88	2.74	2.84	4.26	2.12	1.75	1.93	2.19	1.77	1.76	2.16
Figure 4G
Spleen %IL17+ of CD4+	0.33	0.16	0.26	0.19	0.35	0.13	0.51	0.68	0.62	0.72	0.61	0.65	0.66	0.63	0.71	0.63	0.32	0.33	0.63	0.24	0.38	0.82	0.92	0.86	0.42	0.44	0.39	0.49	0.51	0.32	0.75	0.17	0.39	0.42	0.73	0.61	0.64	0.88
Figure 4H
Spleen %FoxP3+ of CD4+	5.06	4.49	4.62	3.33	7.56	4.8	4.76	6.15	5.03	6.95	5.64	5.82	5.69	4.41	7.36	4.65	3.42	4.58		5.44	5.28	3.08	3.54	3.09	3.98	3.57	4.15	3.52	3.01	5.6	6.18	6.37	5.88	5.31	4.65	4.56	5.13	6.5
Figure 4I
SF #CD8+	354	485	590	244	1084	756	142	437	787	4729	1935	3075	1204	943	2258	573	1030	1755	388	885	752	724
