# Supplementary material for: Latent gammaherpesvirus exacerbates arthritis through modification of age-associated B cells
Source: eLife. 2021 Jun 3;10:e67024. doi: 10.7554/eLife.67024 (PMC8337075; doi:10.7554/eLife.67024)
Supplement: Figure 5—figure supplement 1—source data 1. [file elife-67024-fig5-figsupp1-data1.xlsx]

## Sheet: Sheet1
Figure 5 - figure supplement 1B		CIA														MHV68 CIA
Spleen %ABCs by sex	F	1.29	0.36	0.91	2.37	0.98	1.24	3.98	1.47	5.94	2.23	3.85	5.99			1.32	1.51	0.29	2.94	3.95	2.87	2.75	5.64	4.06	5.05	3.47
	M	0.65	0.62	0.82	0.85	1.32	1.42	1.97	2.04	3.29	1.85	2.88	5.98	3.1	3.6	1.87	1.34	1.22	3.14	2.95	4.95	2.24	3.25	3.76	5.58	4.95	8.21	6.03
Figure 5 - figure supplement 1C	CIA															MHV68 CIA
ILN %CD11c+Tbet+ of CD19+IgD-	0.12	0.22	0.35	0.35	0.19	0.64	0.47	0.51	0.42	0.3	0.29	0.52	0.3	0.35	0.21	0.69	0.55	0.14	0.44	0.95	0.74	0.37	0.47	0.41	0.33	0.35	0.27	0.25	0.38
Figure 5 - figure supplement 1D
Spleen %CD20+ of ABCs	87.1	78.9	79.7	78	89.1	80	83	66.2	80.1	70.2	72.8	68.7	80.7	59.3	62.6	74.1	78.9	70	70.1	75.7	80	84.4	68.8	72.3	74.8	84.6	82.9	84	78.6
Figure 5 - figure supplement 1E
Spleen %TNFa+ of ABCs	13.9	57.9	20.3	36.6	8.7	20	64.5	54.5	57.2	53	59.9	58.5	59.6	57.7		44.3	45.6	50	20.8	26.6	39.5	56.9	52.5	60.4	54	55.1	54.9
Figure 5 - figure supplement 1F
Spleen %CD95+ of ABCs	19.9	19	49.5	34.3	30.7	39.8	54.9	29.6	26.9	58.2	37.5	17.9	8.23	16.8	41.1	39.2	33.9	40.3	20.5	37.7	42.3	39.8	40.6	38.4	35.1	26.7	47.7	34.7	35.6	38	42.8	29.4	31.4	31.9	43.2	35.9	50.2	49.9	40.4	39	28.9	35.3	33.1
Figure 5 - figure supplement 1G
Spleen %IDO+ of ABCs	99.5	98.8	99.1	98	98.3	98.4	99.6	99.5	99.6	99.2	99.3	99.1	98.8	99.4	98.9	99.1	97.5	99.5	97.5	94.8	99.5	99.7	99.3	99.6	99.7	99.7
