# Supplementary material for: Latent gammaherpesvirus exacerbates arthritis through modification of age-associated B cells
Source: eLife. 2021 Jun 3;10:e67024. doi: 10.7554/eLife.67024 (PMC8337075; doi:10.7554/eLife.67024)
Supplement: Figure 5—source data 1. [file elife-67024-fig5-data1.xlsx]

## Sheet: Sheet1
Figure 5A	CIA																										MHV68 CIA
Spleen %CD11c+Tbet+ of CD19+IgD-	1.29	0.36	0.91	0.65	0.62	0.82	2.37	0.98	1.24	3.98	1.47	0.85	1.32	1.42	1.97	2.04	3.29	5.94	2.23	3.85	5.99	1.85	2.88	5.98	3.1	3.6	1.32	1.51	0.29	1.87	1.34	1.22	2.94	3.95	2.87	2.75	3.14	2.95	4.95	2.24	3.25	3.76	5.64	4.06	5.05	3.47	5.58	4.95	8.21
Figure 5B	CIA																							MHV68 CIA																				Naïve
Spleen #CD19+CD11c+Tbet+	275110	114125	76230	139425	62700	112200	227040	98670	80520	97185	44550	35200	75735	71280	68530	44165	121000	92565	21774.5	37400	39325	25069	38665	130680	210485	150645	267245	70840	364870	145530	152460	94050	138765	111540	62370	77605	85800	146795	65450	11286	72600	39600	57172.5	33435	22960	22748	105600	89760	114840
Figure 5C
Spleen %IL10+ of ABCs	3.06	4.55	1.85	1.86	3.42	3.11	3.73	1.87	3.96	2.26	6.52	1.45	2.55	0.64	0.75	1.94	0.56	0.57	1.48	2	1.11	1.16	1.76	1.82	1.42	1.99	1.17	1.06	0.26	1.34	1.1	1	1.75	1.26	0.4	2.27
Spleen %IFNg+ of ABCs	26.7	57.9	36.8	56.1	34.8	30	33.3	38.7	32	43.1	39.1	71.1	56.7	50	45.5	44.7	51.4	28.1	48.7	43	49.1	58.4	47.8	63.6
Figure 5D
Spleen %CTLA4+ of ABCs	3.41	4.76	8.87	1.96	7.47	8.66	10.9	5.53	7.44	14.6	10.9	4.24	5.94	5	12.1	9.9	10.3	15.3	7.92	10.3	13.2	11.5	10	1.52	4.28	5.83	5.79	2.81	1.05	3.54	5.18	4.57	4.16	2.76	3.7	3.91	5.1	7.84	3.62	3.76	3.82	4.96	2.72
Figure 5E
Spleen %PDL1+ of ABCs	80.7	86.9	74.9	81.4	74.7	75.6	74.8	67.7	67	66.2	68.2	68.2	69.4	71.7	75.4	80.2	71	73.5	84.7	79.2	69.1	79.6	74.1	74.5	72.8	76.7	68.9	68.4	59.7	60.6	59.1	64.9	57.3	64	58.5	70.2	83.6	71.7	86.6	70.6	77	52.3	68.4
Figure 5F
Spleen %PD1+ of ABCs	10.9	15.8	19.5	14.6	32.6	26.9	28.4	34.7	19.5	28.4	26.9	24.3	22.8	13.8	25.5	20.9	20.4	25.2	22.9	22.1	25.2	26		13.9	14		15.6	12.8	10	23.1	20.4	22.2	24.1	26	22.2	17.2	23.4	16.5	19.9	17.1	17.8	12	16.2
Figure 5G
Spleen %IgD+IgM+ of ABCs	16.4	35.7	19.3	9.8	14.1	15.7	26	24.4	24	15.2	21.8	17.4	21.9	18.5	18.5	21	15.3	15.4	17.9	24.6	13.9	19.7	15.8	24.3	16.6	17.5	10.5	18.4	8.9	13.9	18.4	16	15.6	14.9	17	10.5	17.4	11.8	22	14.5	22.1	8.12	10.7
Figure 5H
Spleen %MHCII+ of ABCs	47	61.9	79.2	57.8	66	66.9	90.9	79.7	85.1	92.3	84.3	79.9	71.8	79.2	91.6	87.9	86.7	85	81.4	80.5	92.2	85.8	87.4	79.1	86.8	71.7	86.2	78.8	73.3	87.8	89	82	86.7	85.8	85.3	91.1	91.2	90.6	92.7	87.3	93.4	82.5	90.4
Figure 5I
Spleen %CD27+ of ABCs	15.8	31.6	29.3	39	15.2	20	20.6	29.1	31.4	13	16.7	25	29.2	22.8	7.25	17.8	11.9	11.7	26.2	26.3	15.8	23.7	15.3	30.8	29.2	50	22.1	24.5	35.7	19.4	27.5	29.4	25.9	21.9	27.2	6.77	14.5	14	20.6	13.2	14.3	10	14.6
[truncated: 26 more columns]
