# Supplementary material for: Latent gammaherpesvirus exacerbates arthritis through modification of age-associated B cells
Source: eLife. 2021 Jun 3;10:e67024. doi: 10.7554/eLife.67024 (PMC8337075; doi:10.7554/eLife.67024)
Supplement: Figure 6—figure supplement 1—source data 1. [file elife-67024-fig6-figsupp1-data1.xlsx]

## Sheet: Sheet1
Figure 6 - figure supplement 1A	CIA Ctrl						CIA KO						MHV68 CIA Ctrl								MHV68 CIA KO
Spleen %CD8+ of CD45+	8.2	8.51	7.69	12.1	12	7.96	6.47	8.83	8.87	5.69	10.6	11.3	9.53	12.9	8.37	13.4	12.5	19.8	14	17.8	9.19	9.17	7.54	6.76	11.6	11.6	14.7
Figure 6 - figure supplement 1B
Spleen %CD4+ of CD45+	10.7	13.4	8.29	11.9	15.2	11	11.3	12.4	12.6	8.65	9.01	14.9	12.4	13.2	8.63	14.4	13.2	13.6	7.73	7.74	15.1	19.7	11.6	7.05	13.9	14.2	16.5
Figure 6 - figure supplement 1C
Spleen %FoxP3+ of CD4+	9.09	9.71	13	9.83	10.6	16.6	8.38	10.5	25.9	19.9	17.7	10.6	9.1	6.9	8.8	7.58	10.7	6.37	19.3	6.59	9.4	7.8	9.5	8.8	22.1	13.6	10.9
Figure 6 - figure supplement 1D
Spleen %IL17+ of CD4+	1.49	2.21	0.45	0.64	0.63	1.01	1.81	1.9	2	1.6	0.93	0.67	1.82	1.43	1.53	0.69	1.15	1.17	4.61	0.69	1.24	1.3	1.01	1.53	1.8	1.01	0.54
Figure 6 - figure supplement 1E
Spleen %IFNg+ of CD4+	4.37	4.05	2.35	2.9	3.05	8.51	4.35	4.47	10.2	7.04	5.51	3.02	4.84	3.59	5.41	2.66	4.81	5.44	11.8	3.86	5.12	3.66	7.99	8.86	3.86	3.16	5.1
Figure 6 - figure supplement 1F
Spleen %IFNg+ of CD8+	5.35	8.31	3.86	5.17	5.46	8.54	5.26	6.26	10.6	9.78	7.17	5.25	7.02	8.22	6.69	4.78	6.31	10.9	10.5	10.2	4.84	8.67	13.5	8.88	5.64	5.8	5.7
