# Supplementary material for: Latent gammaherpesvirus exacerbates arthritis through modification of age-associated B cells
Source: eLife. 2021 Jun 3;10:e67024. doi: 10.7554/eLife.67024 (PMC8337075; doi:10.7554/eLife.67024)
Supplement: Figure 6—source data 1. [file elife-67024-fig6-data1.xlsx]

## Sheet: Sheet1
Figure 6A	CIA Ctrl						CIA KO						MHV68 CIA Ctrl						MHV68 CIA KO
%CD11c+Tbet+ of CD19+IgD-	1.07	1.68	0.78	0.45	1.33	1.38	0.22	0.34	0.58	0.7	0.68	0.54	1.07	1.68	0.78	0.45	1.33	1.38	0.33	0.18	0.3	0.64	1.03	0.93	0.97
Figure 6B-D
Day post-induction
0	0	0	0	0	0	0	0	0	0	0	0	0	0	0	0	0	0	0	0	0	0	0	0	0	0	0	0
	0	0	0	0	0	0	0	0	0	0	0	0	0	0	0	0	0	0	0	0	0	0	0	0	0	0	0
	0	0	0	0	0	0	0	0	0	0	0	0	0	0	0	0	0	0	0	0	0	0	0	0	0	0	0
7	0	0	0	0	0	0	0	0	0	0	0	0	0	0	0	0	0	0	0	0	0	0	0	0	0	0	0
	0	0	0	0	0	0	0	0	0	0	0	0	0	0	0	0	0	0	0	0	0	0	0	0	0	0	0
	0	0	0	0	0	0	0	0	0	0	0	0	0	0	0	0	0	0	0	0	0	0	0	0	0	0	0
14	0	0	0	0	0	0	0	0	0	0	0	0	0	0	0	1	0	1	2	0	0	0	0	0	0	0	0
	0	0	0	1	0	0	0	0	0	0	0	0	0	0	0	1	0	1	2	1	0	0	0	0	0	0	0
	0	0	0	1	0	1	0	1	0	1	0	0	1	0	0	1	1	2	2	2	1	0	0	0	0	0	1
21	0	0	1	1	1	1	1	0	1	1	0	0	2	1	0	1	1	1	2	1	1	0	1	1	0	1	1
	1	1	0	1	1	1	1	1	2	1	1	1	0	0	2	2	1	2	3	1	0	0	1	1	0	1	0
	1	1	1	1	1	2	1	0	1	1	0	1	1	0	0	2	1	2	3	2	0	1	2	1	1	1	0
28	1	1	1	1	2	1	2	0	1	1	2	1	1	1	1	2	1	3	3	2	2	2	1	2	1	1	1
	1	2	1	1	2	1	2	2	1	1	2	1	2	3	2	3	2	2	3	2	1	2	2	2	0	1	0
	2	3	1	1	2	1	2	3	2	1	2	1	2	1	2	3	3	2	1	2	1	2	2	2	0	1	1
35	2	2	1	1	2	2	3	2	2	2	2	1	3	2	2	3	2	3	2	4	3	3	0	2	0	2	1
	1	2	1	1	2	1	3	1	2	1	1	1	2	2	2	2	3	3	3	4	2	2	2	2	0	1	2
	1	2	1	2	1	2	3	4	2	2	2	1	3	4	3	3	3	2	3	3	3	2	3	2	1	2	1
42	2	2	1	2	2	2	2	2	2	2	3	2	1	3	2	3	2	3	4	4	2	2	3	2	0	2	1
	2	2	2	2	1	2	3	2	2	2	3	2	2	2	3	2	3	3	4	3	2	2	3	3	0	2	2
	2	2	1	2	2	2	2	2	2	2	3	2	3	2	3	5	2	2	3	3	4	4	2	3	1	2	2
49	3	2	3	3	2	3	4	2	3	3	3	2	2	2	3	5	3	3	4	3	4	3	2	3	1	2	3
	3	4	4	3	2	3	2	3	3	3	3	3	3	4	3	5	4	4	4	4	4	4	3	3	2	3	3
	3	2	3	4	2	2	4	4	3	3	3	2	4	4	4	5	4	4	4	4	5	4	3	3	2	2	3
56	4	4	4	3	2	3	5	4	3	4	3	3	5	4	5	5	5	4	3	4	5	5	4	3	3	2	2
Figure 2E
Day of onset	24	24	26	17	21	19	21	19	21	19	28	24	19	21	24	14	19	14	14	17	19	26	21	21	26	21	19
