# Supplementary material for: Latent gammaherpesvirus exacerbates arthritis through modification of age-associated B cells
Source: eLife journal article supplement (doi:10.7554/elife.67024), 2021-06-03

**A**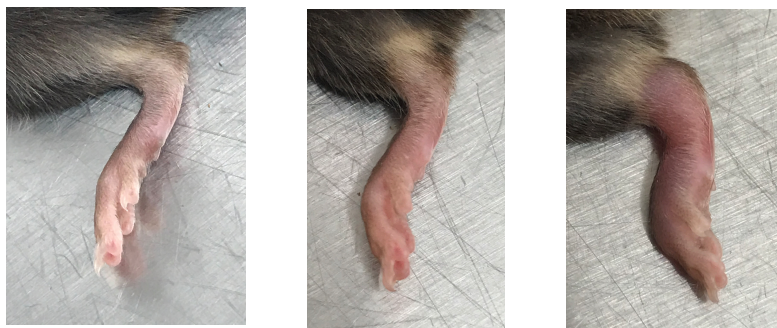

Score 1

Score 2

Score 3

**B**

Area under the curve

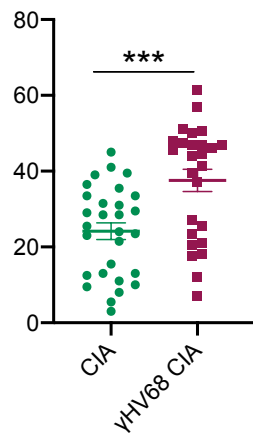**C**

End point

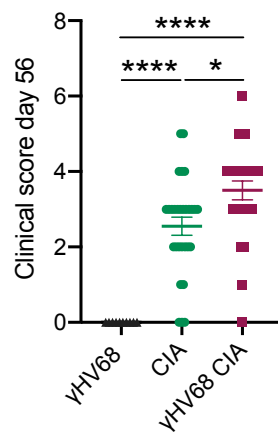**D**

Cumulative score

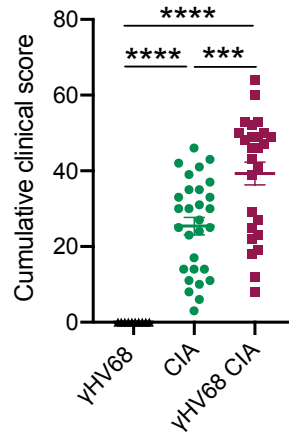**E**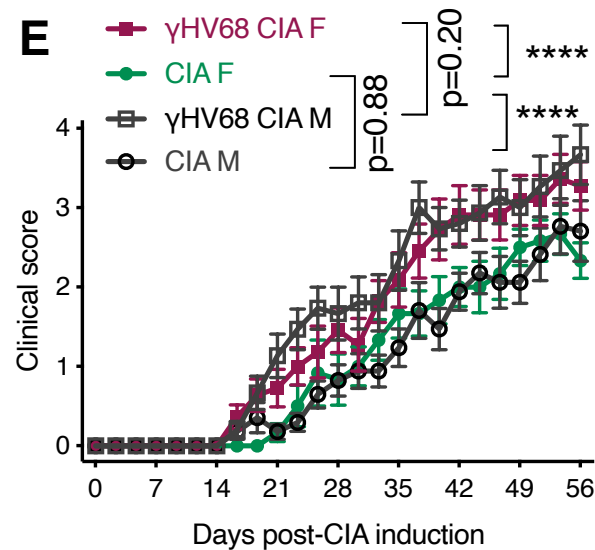**F**

IgG

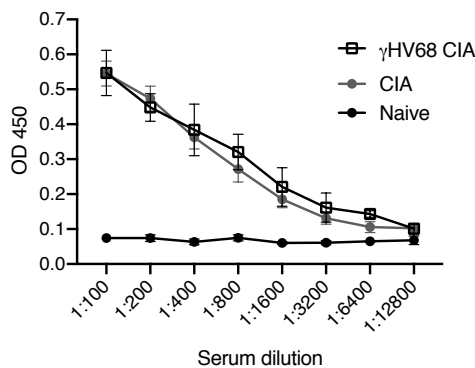**G**

IgG1

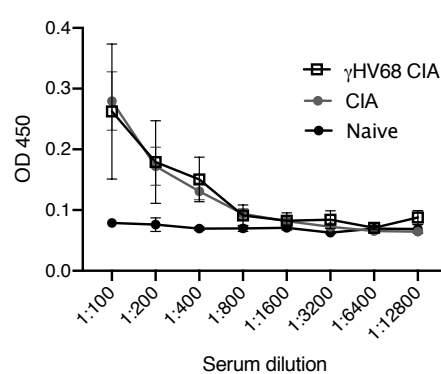**H**

IgG2c

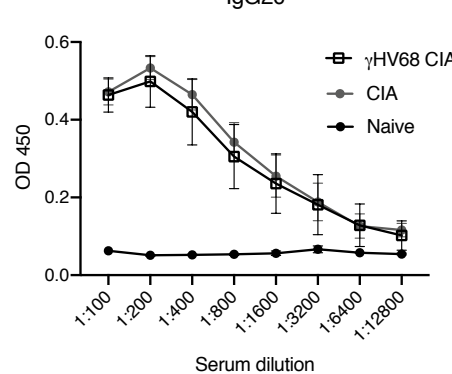**I**Copies  $\gamma$ HV68 per  $10^6$  cells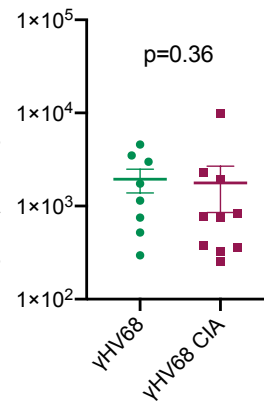

Supplement: supp [file elife_poa_e67024_Figure_1_figure_supplement_1.pdf › elife_poa_e67024_Figure_1_figure_supplement_1.pdf]
