# Supplementary material for: Latent gammaherpesvirus exacerbates arthritis through modification of age-associated B cells
Source: eLife journal article supplement (doi:10.7554/elife.67024), 2021-06-03

**A**Spleen CD8<sup>+</sup>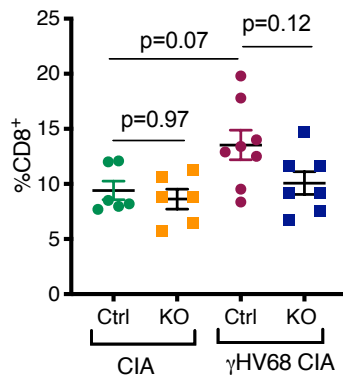**B**Spleen CD4<sup>+</sup>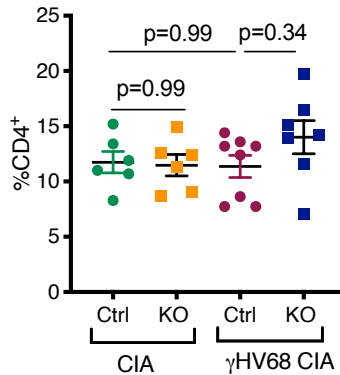**C**Spleen FoxP3<sup>+</sup> of CD4<sup>+</sup>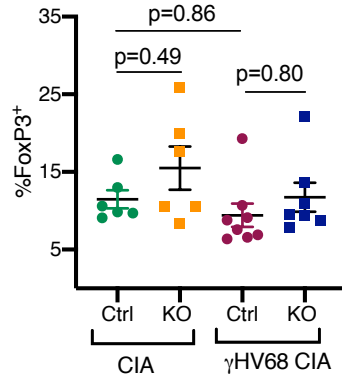**D**Spleen IL17<sup>+</sup> of CD4<sup>+</sup>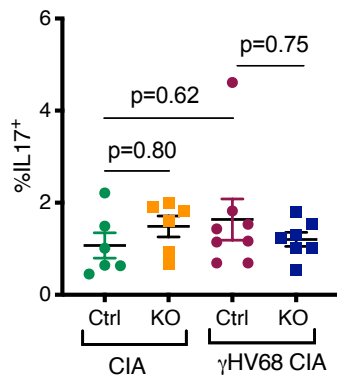**E**Spleen IFNγ<sup>+</sup> of CD4<sup>+</sup>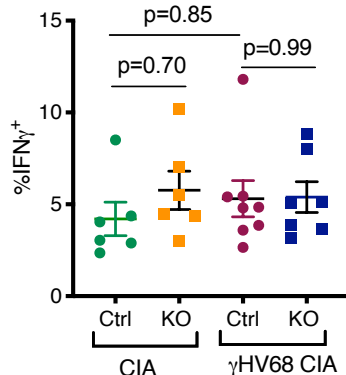**F**Spleen IFNγ<sup>+</sup> of CD8<sup>+</sup>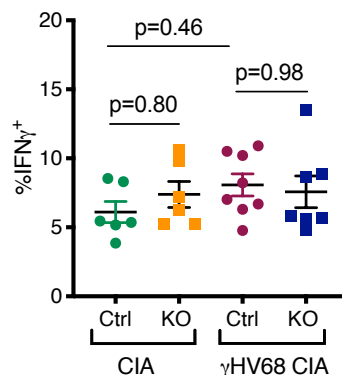

Supplement: supp [file elife_poa_e67024_Figure_6_figure_supplement_1.pdf › elife_poa_e67024_Figure_6_figure_supplement_1.pdf]
