# Supplementary figures and images for: Latent gammaherpesvirus exacerbates arthritis through modification of age-associated B cells
Source: eLife journal article supplement (doi:10.7554/elife.67024), 2021-06-03

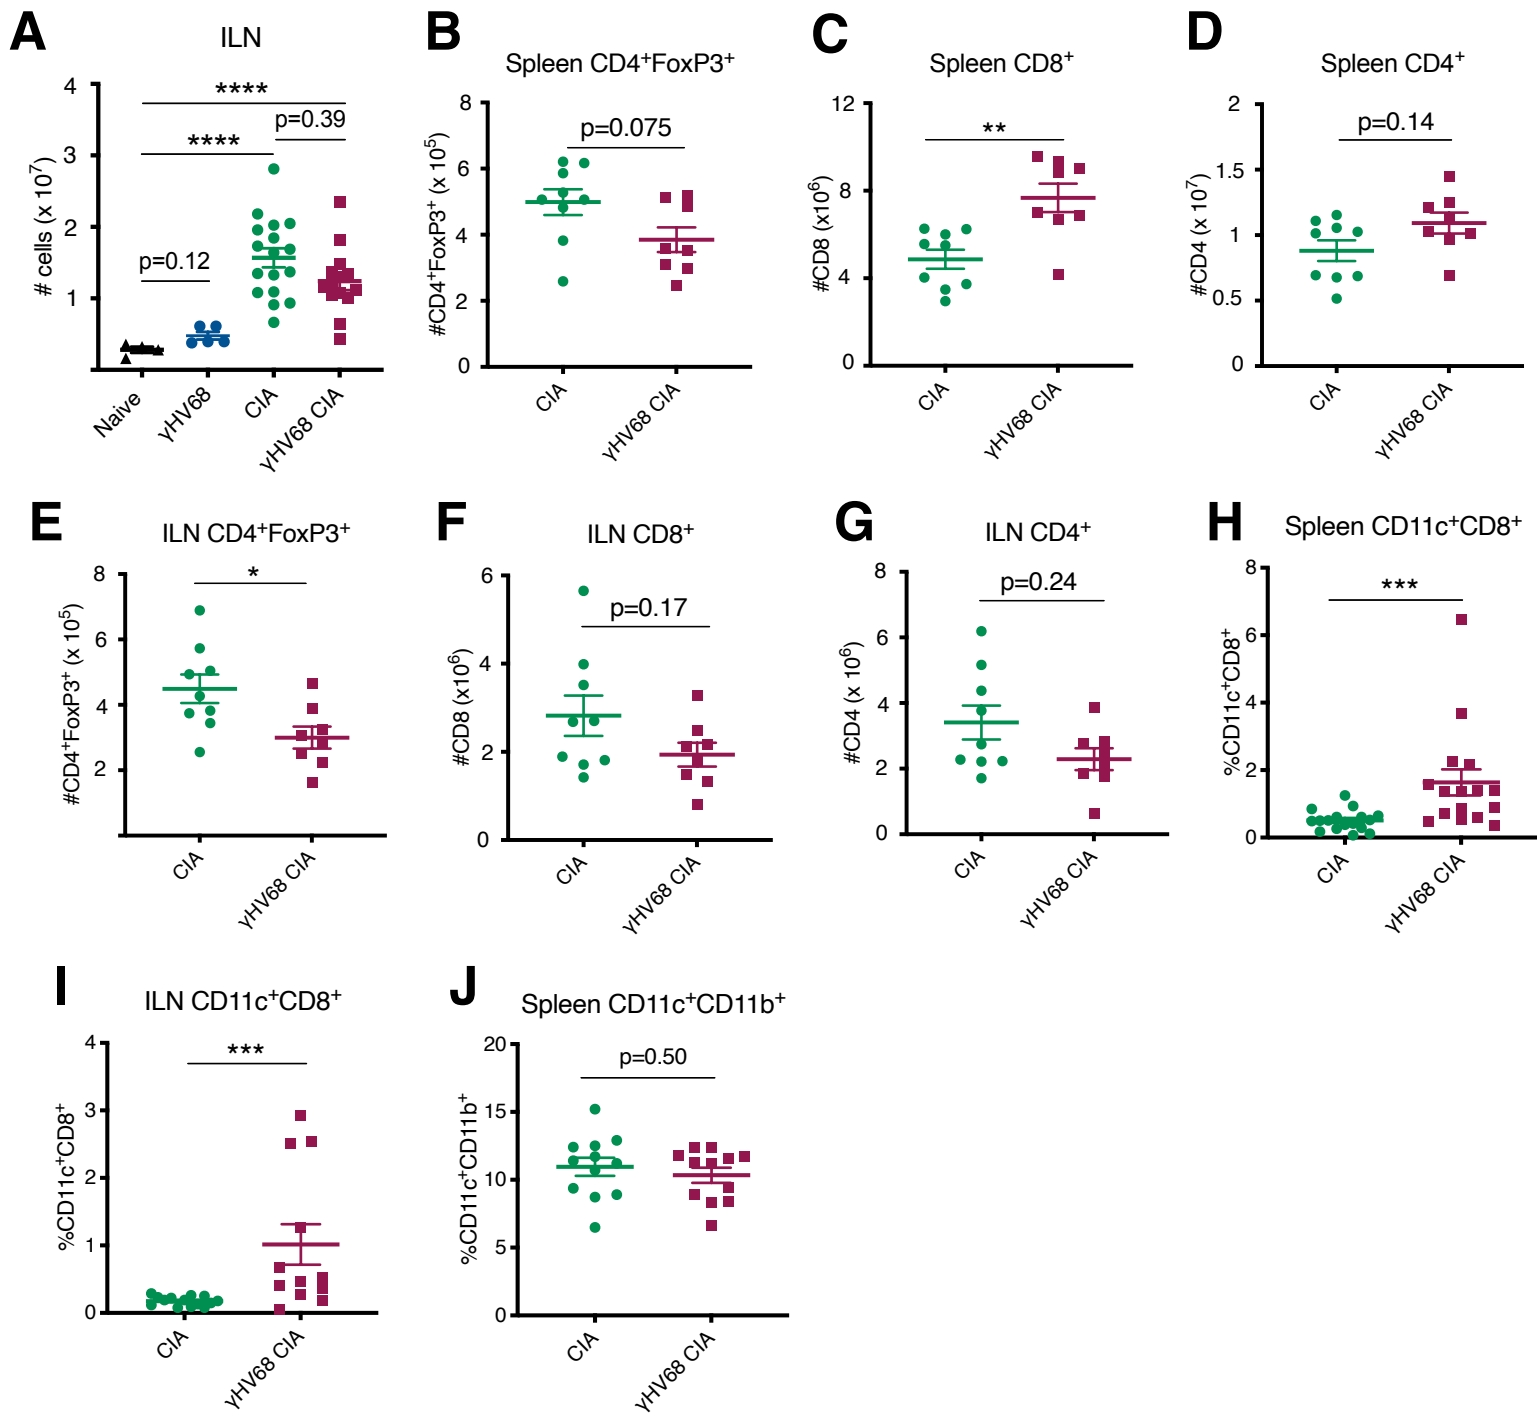

Supplement: supp [file elife_poa_e67024_Figure_3_figure_supplement_1.pdf › elife_poa_e67024_Figure_3_figure_supplement_1.pdf]

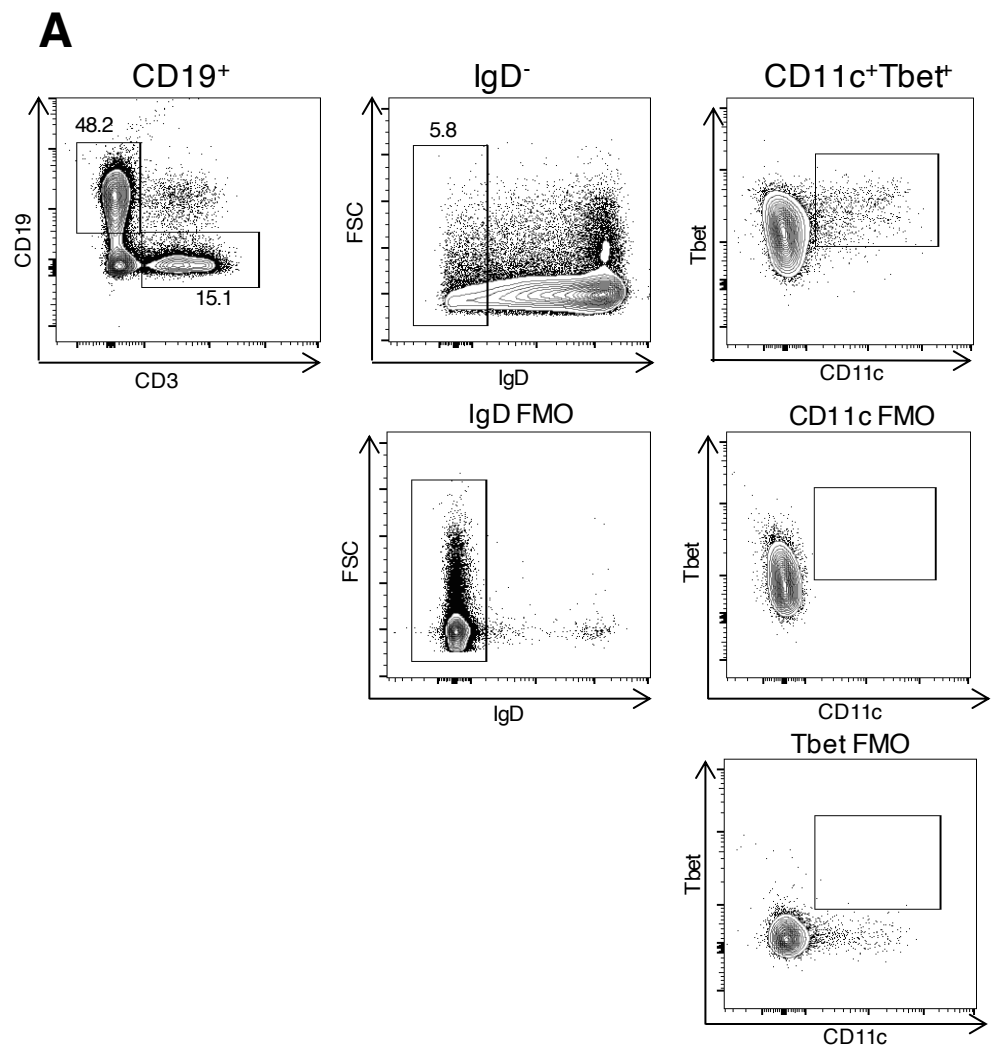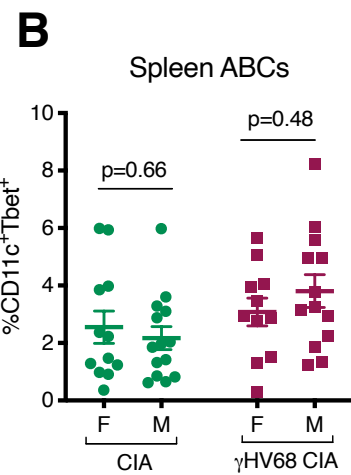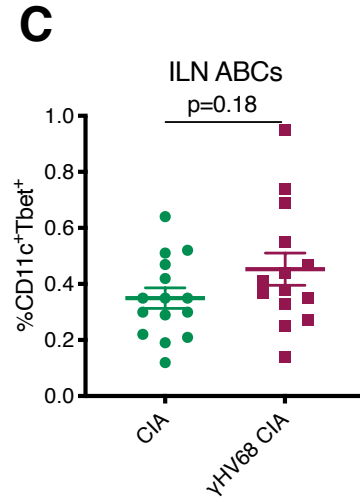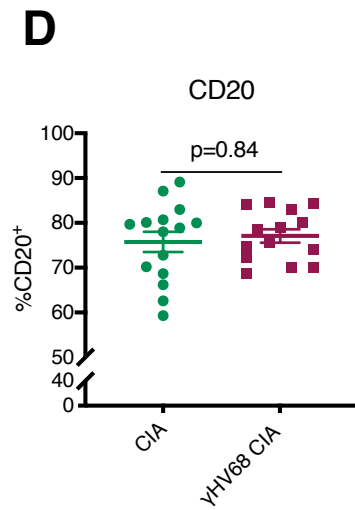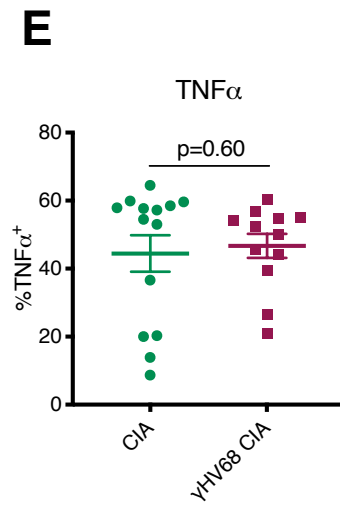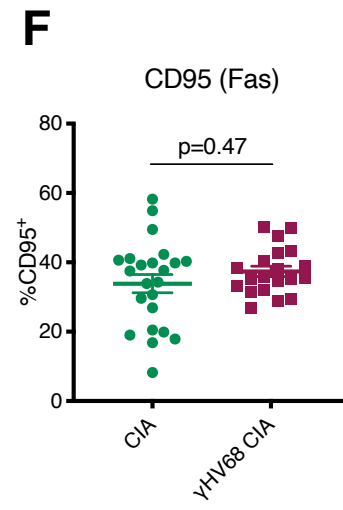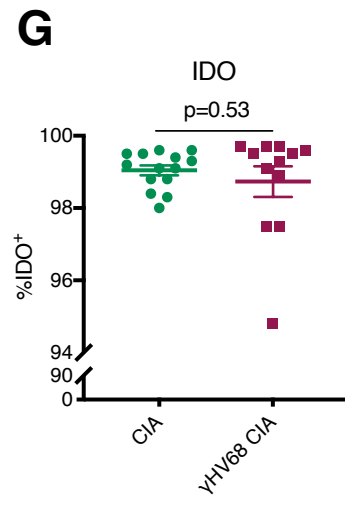

Supplement: supp [file elife_poa_e67024_Figure_5_figure_supplement_1.pdf › elife_poa_e67024_Figure_5_figure_supplement_1.pdf]
